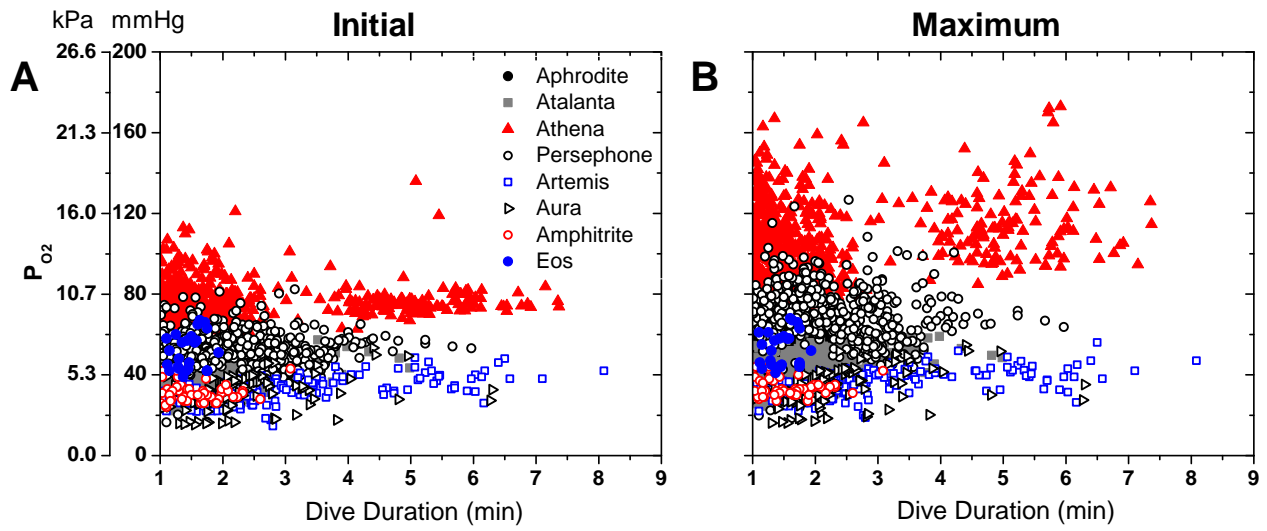

Figure A1. Initial venous  $P_{O_2}$  (A) and maximum venous  $P_{O_2}$  (B) vs. dive duration.
